# Supplementary material for: Prognostic Value of Histone Acetyl Transferase 1 (HAT-1) and Inflammatory Signatures in Pancreatic Cancer
Source: MDPI journal article supplement (doi:10.3390/cimb46050239), 2024-04-25
Supplement: s1 [file s1]

Supplementary material (SM):

SM1. List of p-values associated to each Spearman correlation coefficient for each pair of variables:

|                                          |                                         |                                         |                                          |
|------------------------------------------|-----------------------------------------|-----------------------------------------|------------------------------------------|
| \$`HAT-1-IMP4`<br>[1] 6.787995e<br>-07   | \$`IMP4-RBBP7`<br>[1] 4.198317e<br>-08  | \$`IMP5-AIF-1`<br>[1] 6.358696e<br>-06  | \$`RBBP7-ASF-1`<br>[1] 3.398881e<br>-11  |
| \$`HAT-1-IMP5`<br>[1] 8.111142e<br>-05   | \$`IMP4-H3`<br>[1] 6.350476e<br>-14     | \$`IMP5-IL-12A`<br>[1] 0.0002626<br>645 | \$`RBBP7-PGAM1`<br>[1] 0.0127835<br>8    |
| \$`HAT-1-NASP`<br>[1] 2.621481e<br>-05   | \$`IMP4-H4`<br>[1] 5.312062e<br>-11     | \$`IMP5-IL-18`<br>[1] 0.1527061         | \$`RBBP7-AIF-1`<br>[1] 0.0002355<br>17   |
| \$`HAT-1-RBBP7`<br>[1] 2.784122e<br>-05  | \$`IMP4-ASF-1`<br>[1] 5.329071e<br>-15  | \$`IMP5-IL-10`<br>[1] 0.0015363<br>68   | \$`RBBP7-IL-12A`<br>[1] 7.616569e<br>-07 |
| \$`HAT-1-H3`<br>[1] 1.503178e<br>-06     | \$`IMP4-PGAM1`<br>[1] 7.221345e<br>-05  | \$`NASP-RBBP7`<br>[1] 1.442853e<br>-06  | \$`RBBP7-IL-18`<br>[1] 0.2643393         |
| \$`HAT-1-H4`<br>[1] 6.227679e<br>-07     | \$`IMP4-AIF-1`<br>[1] 0.0002055<br>784  | \$`NASP-H3`<br>[1] 2.282619e<br>-12     | \$`RBBP7-IL-10`<br>[1] 0.0004923<br>455  |
| \$`HAT-1-ASF-1`<br>[1] 6.378745e<br>-06  | \$`IMP4-IL-12A`<br>[1] 1.318041e<br>-06 | \$`NASP-H4`<br>[1] 7.709597e<br>-10     | \$`H3-H4`<br>[1] 0                       |
| \$`HAT-1-PGAM1`<br>[1] 0.0027579<br>94   | \$`IMP4-IL-18`<br>[1] 0.1224245         | \$`NASP-ASF-1`<br>[1] 1.808265e<br>-11  | \$`H3-ASF-1`<br>[1] 5.208722e<br>-11     |
| \$`HAT-1-AIF-1`<br>[1] 0.0288277<br>5    | \$`IMP4-IL-10`<br>[1] 0.0022692<br>44   | \$`NASP-PGAM1`<br>[1] 5.621866e<br>-05  | \$`H3-PGAM1`<br>[1] 0.0004912<br>666     |
| \$`HAT-1-IL-12A`<br>[1] 3.024147e<br>-05 | \$`IMP5-NASP`<br>[1] 2.615241e<br>-12   | \$`NASP-AIF-1`<br>[1] 3.248003e<br>-05  | \$`H3-AIF-1`<br>[1] 1.177401e<br>-06     |
| \$`HAT-1-IL-18`<br>[1] 0.0059357<br>72   | \$`IMP5-RBBP7`<br>[1] 1.28738e-<br>08   | \$`NASP-IL-12A`<br>[1] 6.560214e<br>-05 | \$`H3-IL-12A`<br>[1] 4.419348e<br>-09    |
| \$`HAT-1-IL-10`<br>[1] 0.0040999<br>83   | \$`IMP5-H3`<br>[1] 3.952394e<br>-14     | \$`NASP-IL-18`<br>[1] 0.0566136<br>4    | \$`H3-IL-18`<br>[1] 0.0156517<br>7       |
| \$`IMP4-IMP5`<br>[1] 5.329071e<br>-15    | \$`IMP5-H4`<br>[1] 3.135536e<br>-11     | \$`NASP-IL-10`<br>[1] 0.0020986<br>42   | \$`H3-IL-10`<br>[1] 0.0002181<br>515     |
| \$`IMP4-NASP`<br>[1] 5.382798e<br>-08    | \$`IMP5-ASF-1`<br>[1] 5.329071e<br>-15  | \$`RBBP7-H3`<br>[1] 4.347481e<br>-08    | \$`H4-ASF-1`<br>[1] 1.027372e<br>-08     |
|                                          | \$`IMP5-PGAM1`<br>[1] 0.0001525<br>647  | \$`RBBP7-H4`<br>[1] 8.222441e<br>-06    |                                          |

\$`H4-PGAM1`  
[1] 0.0003051  
626

\$`H4-AIF-1`  
[1] 7.521702e  
-06

\$`H4-IL-12A`  
[1] 9.02059e-  
07

\$`H4-IL-18`  
[1] 0.0087478  
04

\$`H4-IL-10`  
[1] 0.0003611  
978

\$`ASF-1-PGAM1`  
[1] 2.403285e  
-06

\$`ASF-1-AIF-1`  
[1] 0.0003221  
601

\$`ASF-1-IL-12`  
A`  
[1] 2.829045e  
-06

\$`ASF-1-IL-18`  
[1] 0.1403787

\$`ASF-1-IL-10`  
[1] 0.0043851  
62

\$`PGAM1-AIF-1`  
[1] 0.0165192  
3

\$`PGAM1-IL-12`  
A`  
[1] 0.0022544  
15

\$`PGAM1-IL-18`  
[1] 0.1230768

\$`PGAM1-IL-10`  
[1] 0.0262647  
9

\$`AIF-1-IL-12`  
A`  
[1] 0.0001353  
335

\$`AIF-1-IL-18`  
[1] 0.0319083  
3

\$`AIF-1-IL-10`  
[1] 5.19369e-  
07

\$`IL-12A-IL-1`  
8`  
[1] 0.0035664  
31

\$`IL-12A-IL-1`  
0`  
[1] 0.0027526  
17

\$`IL-18-IL-10`  
[1] 0.0124164  
8
